# Supplementary material for: A conserved motif in human BTG1 and BTG2 proteins mediates interaction with the poly(A) binding protein PABPC1 to stimulate mRNA deadenylation
Source: PubMed Central journal article supplement — RNA Biol. 2021 Jun 1;18(12):2450–65. doi: 10.1080/15476286.2021.1925476 (PMC8632095; doi:10.1080/15476286.2021.1925476), 2021-06-01
Supplement: KRNB_A_1925476_SM2915.pdf [file KRNB_A_1925476_SM2915.pdf]

## Supplementary information

### **A conserved motif in human BTG1 and BTG2 proteins mediates interaction with the poly(A) binding protein PABPC1 to stimulate mRNA deadenylation**

Hamza Amine<sup>1-4</sup>(ORCID 0000-0001-9811-1283), Nina Ripin<sup>5</sup>, <sup>#</sup>(ORCID 0000-0001-6099-6506), Sahil Sharma<sup>6</sup>, <sup>§</sup>(ORCID 0000-0003-4067-5419), Georg Stoecklin<sup>6</sup>(ORCID 0000-0001-9284-9834), Frédéric H Allain<sup>5</sup>, <sup>7</sup>(ORCID 0000-0002-2131-6237), Bertrand Séraphin<sup>1-4</sup>, <sup>\*</sup>(ORCID 0000-0002-5168-1921) and Fabienne Mauxion<sup>1-4</sup>, <sup>\*</sup> (ORCID 0000-0003-0554-8211)

1 Institut de Génétique et de Biologie Moléculaire et Cellulaire (IGBMC), Illkirch, France

2 Centre National de Recherche Scientifique (CNRS) UMR 7104, Illkirch, France

3 Institut National de Santé et de Recherche Médicale (INSERM) U1258, Illkirch, France

4 Université de Strasbourg, Illkirch, France

5 Department of Biology, Institute of Molecular Biology and Biophysics, ETH Zürich, Switzerland

6 Mannheim Institute for Innate Immunoscience (MI3), Medical Faculty Mannheim, Heidelberg University, Mannheim, Germany, and Center for Molecular Biology of Heidelberg University (ZMBH), German Cancer Research Center (DKFZ)-ZMBH Alliance, Heidelberg, Germany

7 Department of Biology, Institute of Biochemistry, ETH Zürich, Switzerland

\* Correspondence should be addressed to BS ([seraphin@igbmc.fr](mailto:seraphin@igbmc.fr)) or FM ([mauxion@igbmc.fr](mailto:mauxion@igbmc.fr))

<sup>#</sup>: present address: Department of Chemistry and Biochemistry, University of Colorado, Boulder, CO, USA

<sup>§</sup>: present address: Institute of Molecular Infection Biology (IMIB), University of Würzburg, Germany

## SUPPLEMENTARY FIGURES

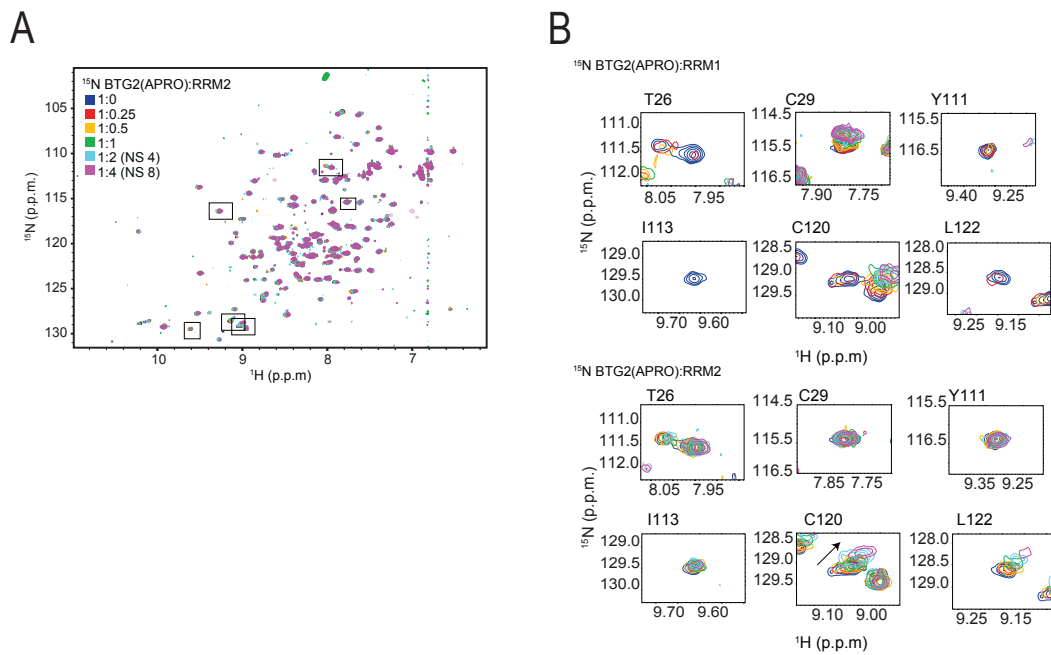

### *Supplemental Figure 1 - Absence or weak interaction between BTG2 and PABPC1 RRM2*

- A) Overlay of  $^1\text{H}$ - $^{15}\text{N}$  HSQC spectra of free BTG2(APRO) (blue) and in complex with increasing amounts of PABP RRM2 (color code as in Fig. 1A). The number of scans (NS) is 2, otherwise indicated if different.
- B) Comparison of key residues of RRM1 and RRM2.

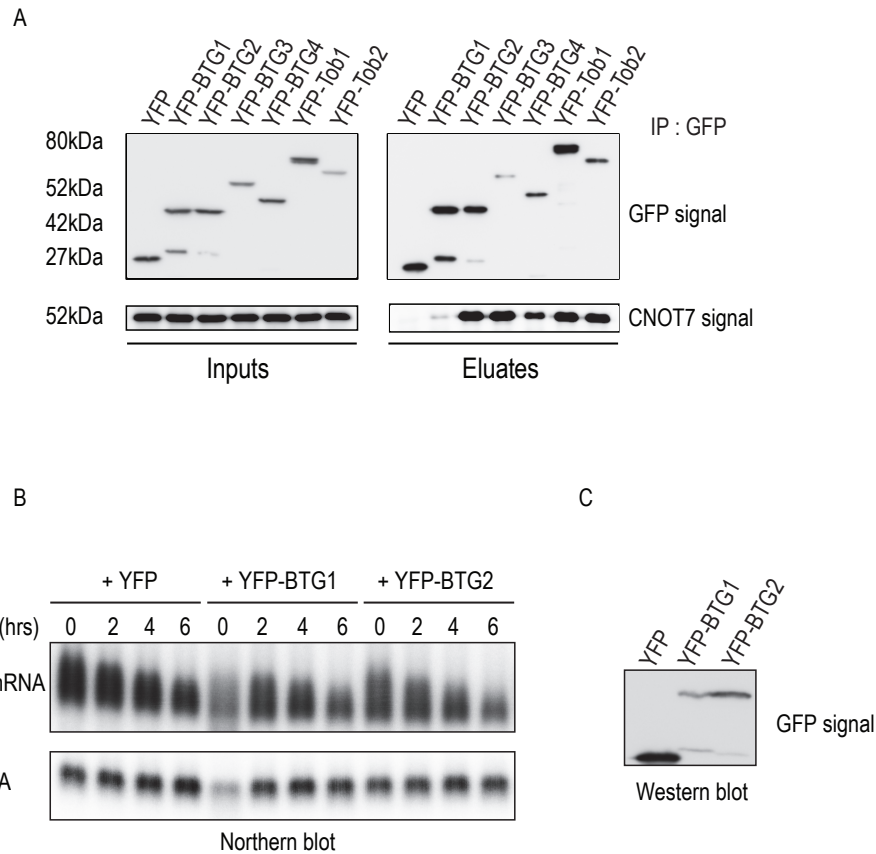

**Supplemental Figure 2 - Expression of YFP-BTG1 stimulates mRNA decay despite a less efficient co-precipitation of endogenous CNOT7**

A) Co-immunoprecipitation of endogenous CNOT7 with YFP-tagged BTG/Tob proteins. HEK293 cells were transfected with plasmids expressing YFP-BTG/Tob fusion proteins or only YFP as control. YFP-tagged proteins were precipitated with GFP-Trap magnetic agarose beads and the co-precipitation of endogenous CNOT7 (home-made polyclonal rabbit antiserum) was analyzed by western blotting.

B) Transcriptional chase experiments showing mRNA decay of the  $\beta$ -globin mRNA reporter in the presence of ectopically expressed YFP proteins. HEK293-TOF cells were co-transfected with reporter plasmid and plasmids expressing YFP-BTG1, YFP-BTG2 or YFP alone as control. Chase time indications correspond to hours after doxycyclin addition. Experiments were repeated twice. Signals obtained for replication-dependent H2B mRNAs

that are not poly-adenylated are shown as loading controls. Quantification of the results indicated half-lives of  $12.25 \pm 2.15$ ,  $7.7 \pm 0.31$  or  $7.7 \pm 1.53$  hours respectively for the reporter co-transfected with YFP, or YFP-BTG1 or YFP-BTG2.

C) A western blot analysis of the cell lysates corresponding to the transfections performed in B is shown as a control.

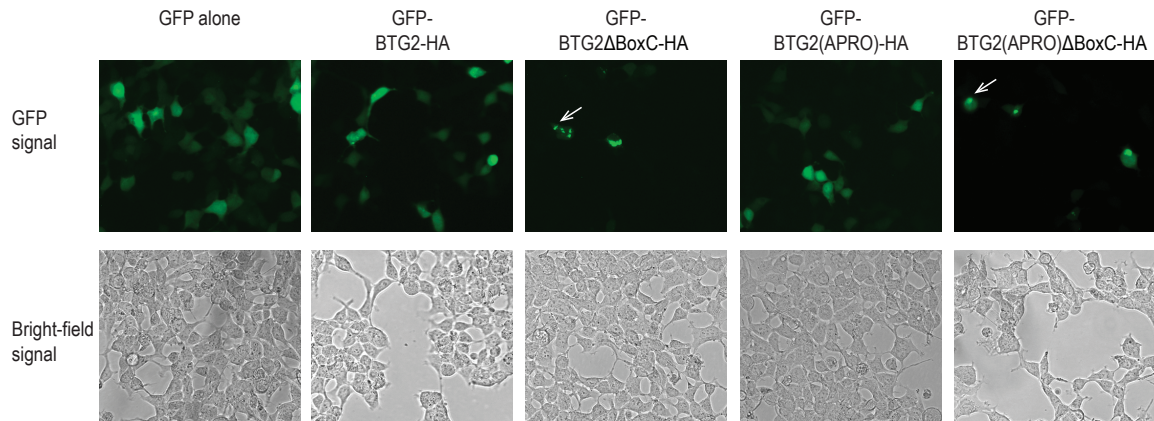

***Supplemental Figure 3 - GFP-BTG2 derivatives deleted of the boxC motif accumulate in cellular aggregates***

HEK293 cells were transfected with plasmids expressing GFP-BTG2 fusion derivatives or GFP alone as indicated. 24 hours after transfection, images of living cells were captured with a FLoid Cell Imaging Station (Life Technologies). Arrows point to some aggregates.

## SUPPLEMENTARY TABLES

*Supplementary Table 1: Plasmids used in this study*

| Plasmid | Vector                | Insert                                                                          | Reference/construction                                                                                                           |
|---------|-----------------------|---------------------------------------------------------------------------------|----------------------------------------------------------------------------------------------------------------------------------|
| pBS2446 |                       | cDNA human BTG2 IMAGE 5186556                                                   |                                                                                                                                  |
| pBS2561 | pET24 derivative      | Encodes 6His-mouse CNOT7                                                        | Reference 1                                                                                                                      |
| pBS2800 | pTet- $\beta$ -globin |                                                                                 | Reference 1                                                                                                                      |
| pBS3352 | pGEX-2T               | Encodes GST-BTG2(APRO) (amino acids 1 to 126)                                   | Reference 1                                                                                                                      |
| pBS3415 | pET24 derivative      | Encodes 6His-human PABPC1(FL)                                                   | Reference 1                                                                                                                      |
| pBS3425 |                       | human Tob1 cDNA                                                                 | Open Biosystems clone MHS1010-7430248                                                                                            |
| pBS3426 |                       | human BTG3 cDNA                                                                 | Open Biosystems clone LIFESEQ4640478                                                                                             |
| pBS3428 |                       | human BTG1 cDNA                                                                 | Open Biosystems clone MHS1010-9206137                                                                                            |
| pBS3499 | pCIneo                | Encodes human Tob1 APRO domain (amino acids 1 to 117) with C-terminal HA tag    | Reference 1                                                                                                                      |
| pBS3503 | pGEX-2T               | Encodes GST-Tob1(APRO) (amino acids 1 to 117)                                   | Reference 1                                                                                                                      |
| pBS4406 | pP6                   | Encodes a Gal4-Activating-Domain – PABPC1 (amino acids 1 to 146) fusion protein | Reference 1                                                                                                                      |
| pBS4409 | pP6                   | Encodes a Gal4-Activating – Domain – human CNOT7 fusion protein                 | Reference 1                                                                                                                      |
| pBS4413 | pB27                  | Encodes a LexA-Binding-Domain - BTG2(APRO) fusion protein                       | Reference 1                                                                                                                      |
| pBS4550 | pB27                  | Encodes a LexA-Binding-Domain – BTG1(APRO) fusion protein                       | Reference 1                                                                                                                      |
| pBS4551 | pB27                  | Encodes a LexA-Binding-Domain – Tob1(APRO) fusion protein                       | Reference 1                                                                                                                      |
| pBS4611 | pET24 derivative      | Encodes 6His-PABPC1(1-190)                                                      | Reference 1                                                                                                                      |
| pBS4849 | pCIneo                | Encodes Tob1(APRO)DGSICVLYvdd-HA                                                | Site-directed mutagenesis of pBS3499 with OBS5628 and OBS5629 to change sequence KGPVK (amino acids 106 to 110) in Tob1 to DGSIC |
| pBS4944 | pET24 derivative      | Encodes 6HIS-PABPC1-RRM2 (amino acids 85 to 190)                                | PCR on pBS3415 with OBS5453+OBS6068 cut XbaI-BamHI + pET24 cut XbaI-BamHI                                                        |
| pBS5189 | pEGFP-C3              | Encodes GFP-BTG2(APRO)-HA                                                       | Reference 1                                                                                                                      |
| pBS5193 | pEGFP-C3              | Encodes GFP-BTG2(APRO)kGpvkVLYEEA-HA                                            | Site-directed mutagenesis of pBS5189 with OBS5449 and OBS5450 to change sequence DGSIC (amino acids 116 to 120) in BTG2 to KGPVK |
| pBS5194 | pEGFP-C3              | Encodes GFP-Tob1(APRO)-HA                                                       | Reference 1                                                                                                                      |
| pBS5295 | pEGFP-C3              | Encodes GFP-BTG2-HA                                                             | Reference 1                                                                                                                      |
| pBS5335 |                       | human BTG4 cDNA                                                                 | Dharmacon clone ID 5271706                                                                                                       |
| pBS5525 | pcDNA6.0              | Encodes V5-His-humanTob2                                                        | This work                                                                                                                        |

|         |            |                                                                      |                                                                                                                                                                          |
|---------|------------|----------------------------------------------------------------------|--------------------------------------------------------------------------------------------------------------------------------------------------------------------------|
| pBS5581 | pcDNA3-YFP | Encodes YFP                                                          |                                                                                                                                                                          |
| pBS5582 | pcDNA3-YFP | Encodes YFP-humanBTG1(FL)                                            | PCR on pBS3428 with G3668 and G3669 cut BglII-XhoI + pBS5581 cut BamHI-XhoI                                                                                              |
| pBS5583 | pcDNA3-YFP | Encodes YFP-humanBTG3(FL)                                            | PCR on pBS3426 with G3670 and G3671 cut EcoRI-XhoI + pBS5581 cut EcoRI-XhoI                                                                                              |
| pBS5584 | pcDNA3-YFP | Encodes YFP-humanTob1(FL)                                            | PCR on pBS3425 with G3674 and G3675 cut BglII-XhoI + pBS5581 cut BamHI-XhoI                                                                                              |
| pBS5585 | pcDNA3-YFP | Encodes YFP-humanBTG2(FL)                                            | PCR on pBS5295 with G2711 and G2752 cut BamHI-XhoI + pBS5581 cut BamHI-XhoI                                                                                              |
| pBS5586 | pcDNA3-YFP | Encodes YFP-humanBTG4(FL)                                            | PCR on pBS5335 with OBS7390+OBS7391 cut BsaI-XhoI + pBS5581 cut BamHI-XhoI                                                                                               |
| pBS5594 | pcDNA3-YFP | Encodes YFP-humanTob2(FL)                                            | PCR on pBS5525 with OBS7392+OBS7393 cut BamHI-XhoI + pBS5581 cut BamHI-XhoI                                                                                              |
| pBS5799 | pCIneo     | Encodes Tob1(APRO)DGSICVLYEEA-HA                                     | Site-directed mutagenesis of pBS4849 with OBS_VDDEEA_F and OBS_VDDEEA_R to change sequence VDD (amino acids 114 to 116) in Tob1 to EEA                                   |
| pBS5875 | pEGFP-C3   | Encodes GFP-Tob1(APRO)DGSICVLYvdd-HA                                 | PCR cut XhoI-PstI amplified with OBS3338 and OBS6169 from pBS4849                                                                                                        |
| pBS5876 | pEGFP-C3   | Encodes GFP-Tob1(APRO)DGSICVLYEEA-HA                                 | PCR cut XhoI-PstI amplified with OBS3338 and OBS6169 from pBS5799                                                                                                        |
| pBS5895 | pB27       | Encodes a LexA-Binding-Domain – Tob1(APRO)DGSICVLYvdd fusion protein | PCR cut SfiI amplified with OBS5268 and OBS8262 from pBS5875                                                                                                             |
| pBS5896 | pB27       | Encodes a LexA-Binding-Domain – Tob1(APRO)DGSICVLYEEA fusion protein | PCR cut SfiI amplified with OBS5268 and OBS8261 from pBS5876                                                                                                             |
| pBS5903 | pEGFP-C3   | Encodes GFP-BTG2(APRO)DboxC                                          | PCR cut XhoI-EcoRI amplified with OBS_deltaboxc_F and OBS_deltaboxc_R from pBS5189                                                                                       |
| pBS5915 | pEGFP-C3   | Encodes GFP-BTG2DboxC-HA                                             | Site-directed mutagenesis of pBS5295 with OBS_btg2FLdeltaboxC_F and OBS_btg2FLdeltaboxC_R to delete sequence DGSICVLYEEA (amino acids 116 to 126) in BTG2                |
| pBS5923 | pEGFP-C3   | Encodes GFP-BTG2(APRO)kGpvkVLYvdd-HA                                 | Site-directed mutagenesis of pBS5189 with OBS_btg2KGPVKVLYVDD_F and OBS_btg2KGPVKVLYVDD_R to change sequence DGSICVLYEEA (amino acids 116 to 126) in BTG2 to KGPVKVLYVDD |
| pBS5973 | pGEX-2T    | Encodes GST-Tob1(APRO)DGSICVLYEEA                                    | Site-directed mutagenesis of pBS3503 with OBS8569 and OBS8570 to change sequence KGPVKVLYVDD to DGSICVLYEEA                                                              |
| pBS6111 | pEGFP-C3   | Encodes GFP-BTG2(APRO)knnafivaEEA-HA                                 | Site-directed mutagenesis of pBS5189 with OBS8573 and OBS8574 to change sequence DGSICVLY (amino acids 116 to 123) in BTG2 to KNNAFIVA                                   |
| pBS6163 | pETGB1-1a  |                                                                      | kind gift from G. Stier and A. Geerlof (EMBL, Heidelberg, Germany)                                                                                                       |

|         |           |                                                    |                                                                             |
|---------|-----------|----------------------------------------------------|-----------------------------------------------------------------------------|
| pBS6164 | pETGB1-1a | Encodes 6His-GB1-PABPC1-RRM1 (amino acids 1 to 99) | PCR on pBS3415 with OBS1957+OBS6158 cut XhoI-BsaI + pBS6163 cut XhoI-NcoI   |
| pBS6165 | pETGB1-1a | Encodes 6His-GB1-BTG2(APRO)                        | PCR on pBS5295 with OBS668+OBS6726 cut EcoRI-BspHI + pBS6163 cut NcoI-EcoRI |
| pBS6166 | pETGB1-1a | Encodes 6His-GB1-BTG2(APRO)kGpvkVLYEEA             | PCR on pBS5193 with OBS668+OBS7487 cut EcoRI-BspHI + pBS6163 cut NcoI-EcoRI |
| pBS6167 | pETGB1-1a | Encodes 6His-GB1-BTG2                              | PCR on pBS2446 with OBS668+OBS2316 cut EcoRI-BspHI + pBS6163 cut NcoI-EcoRI |

**Supplementary Table 2: Oligonucleotides used in this study**

| Name                  | Sequence                                         |
|-----------------------|--------------------------------------------------|
| G2711                 | ATTGGATCCATGAGCCACGGGAAGG                        |
| G2752                 | GGCCTCGAGGCTGGAGACTGCCATCAC                      |
| G3668                 | ATATAGATCTATGCATCCCTTCTACACC                     |
| G3669                 | ATATCTCGAGTTAACCTGATACAGTCAT                     |
| G3670                 | ATATGAATTCATGAAGAATGAAATTGCT                     |
| G3671                 | ATATCTCGAGTTAGTGAGGTGCTAACAT                     |
| G3674                 | ATATAGATCTATGCAGCTTGAAATCCAA                     |
| G3675                 | ATATCTCGAGTTAGTTAGCCATAACAGG                     |
| OBS_btg2FLdeltaboxC_F | GCGGCCAGTGGGCCTCCCAATGC                          |
| OBS_btg2FLdeltaboxC_R | GCATTGGGGAGGCCCACTGGCCGC                         |
| OBS_btg2KGPVKVLYVDD_F | CAAGGTCTTGTACGTGGACGACAATATGTACCCATAACGAC        |
| OBS_btg2KGPVKVLYVDD_R | GTCGTATGGGTACATATTGTCGTCCCAACGTACAAGACCTGA       |
| OBS_deltaboxc_F       | CCGCTCGAGACCATGAGCCACGGGAAGGGAA                  |
| OBS_deltaboxc_R       | TATGAATTCTTACTCCCAATGCGGTAGGA                    |
| OBS_VDDEEA_F          | GGATCCATCTGCGTGCTTTACGAGGAGGCGAATTCCATGTACC<br>C |
| OBS_VDDEEA_R          | CCTAGGTAGACGCACGAAATGCTCCTCCGCTTAAGGTAGATG<br>GG |
| OBS668                | GGATGCGGCCGCAATCATGAGCCACGGGAAGGGAACCGA          |
| OBS1957               | GCGCTCATGAACCCCAAGTGCCCCCAG                      |



|         |                                                                                 |
|---------|---------------------------------------------------------------------------------|
| OBS2316 | CGGGAATTCTAGCTGGAGACTGCCATCAC                                                   |
| OBS3338 | GGCCTCGAGGGATCCATGCAGCTTGAAATCCAAGTAG                                           |
| OBS5268 | ATCGGCCCGACGGGCCATGCAGCTTGAAATCCAAGTAG                                          |
| OBS5449 | CCGCATTGGGGAGAAGGGCCCCGTCAAGGTCTTGTACGAGGA<br>GGC                               |
| OBS5450 | GCCTCCTCGTACAAGACCTTGACGGGGCCCTTCTCCCAATGC<br>GG                                |
| OBS5453 | GCCGGATCCTTAGAATTCTTTTGGCCTAGCTCCAAGTTC                                         |
| OBS5628 | CCAAATTGGTGAAGACGGATCCATCTGCGTGCTTTACGTGGAT<br>G                                |
| OBS5629 | CATCCACGTAAAGCACGCAGATGGATCCGTCTTCACCAATTTG<br>G                                |
| OBS6068 | GGCTCTAGATAAGGAGGATATATATGCATCACCATCACCATC<br>ACATGTGGTCTCAGCGTGATCCA           |
| OBS6158 | GCCCTCGAGTTAGCCTACTCCACTTTTGGGAAG                                               |
| OBS6169 | GACCTGCAGTCATGCGTAGTCTGGTACGTCTGTAT                                             |
| OBS6726 | ACCGAATTCTTAGGCCTCCTCGTACAAGACGC                                                |
| OBS7381 | CTGGGATCCTTATGGCGACTGTCTGAACC                                                   |
| OBS7390 | AACGGTCTCGGATCCATGAGAGATGAAATTGCAACAA                                           |
| OBS7392 | TCAGGATCCATGCAGCTAGAGATCAAAGTGGC                                                |
| OBS7393 | AACCTCGAGTCAGTTGGCCAGCACCACGG                                                   |
| OBS7487 | ACCGAATTCTTAGGCCTCCTCGTACAAGACCTT                                               |
| OBS8261 | ATCGGCCCCAGTGGCCCTTAATTCGCCTCCTCGTAAAGCACG                                      |
| OBS8262 | ATCGGCCCCAGTGGCCCTTAATTATCATCCACGTAAAGCACG                                      |
| OBS8569 | GTTTCTTACCAAATTGGTGAAGACGGCTCCATCTGCGTCTTGT<br>ACGAGGAGGCCAATTAGAATTCATCGTGACTG |
| OBS8570 | CAGTCACGATGAATTCTAATTGGCCTCCTCGTACAAGACGCA<br>GATGGAGCCGTCTTCACCAATTTGGTAAGAAAC |
| OBS8573 | TCCTACCGCATTGGGGAGAAAAACAATGCATTATTGTGGCC                                       |

|         |                                                               |
|---------|---------------------------------------------------------------|
|         | GAGGAGGCCAACATGTA                                             |
| OBS8574 | TACATGTTGGCCTCCTCGGCAACAATGAATGCATTGTTTTCT<br>CCCAATGCGGTAGGA |

## **SUPPLEMENTARY METHODS**

### ***Transcriptional chase experiments and Northern blot analysis***

HEK293 Tet-Off cells were transfected with 0.4 µg of the pTet-β-globin plasmid (pBS2800) and 0.4 µg of the GFP-BTG expressing plasmids in 6-cm diameter culture dishes with Effectene transfection reagent (Qiagen). Two days after transfection, a transcriptional chase was performed by addition of doxycyclin (2 µg/ml). Chase times correspond to hours after doxycyclin addition and to times of RNA extraction.

10 µg of total RNA was electrophoresed onto 1.4% agarose/6% formaldehyde gels and transferred to Hybond-N+ membranes (GE Healthcare). After transfer, blots were stained with methylene blue to check for equal loading and hybridized to probes synthesized by in vitro transcription with the T7 RNA polymerase (Promega). Hybridization signals were visualized with Typhoon FLA 9500 (GE Healthcare).

## **SUPPLEMENTARY REFERENCES**

1. Stupfler B, Birck C, Seraphin B, Mauxion F. BTG2 bridges PABPC1 RNA-binding domains and CAF1 deadenylase to control cell proliferation. *Nature communications* 2016; 7:10811.
